# Supplementary material for: Evolutionary forces affecting synonymous variations in plant genomes
Source: PubMed Central journal article supplement (PMC5460877; doi:10.1371/journal.pgen.1006799), 2017-05-22

protein tree

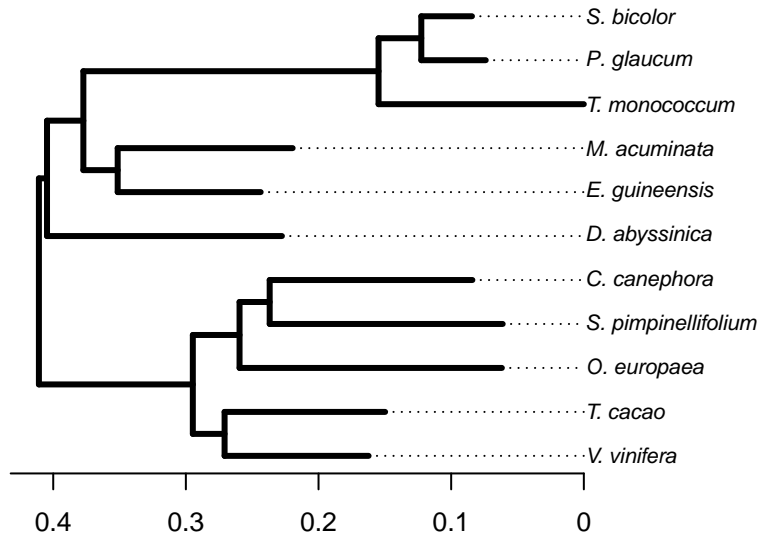

branch lengths = dN

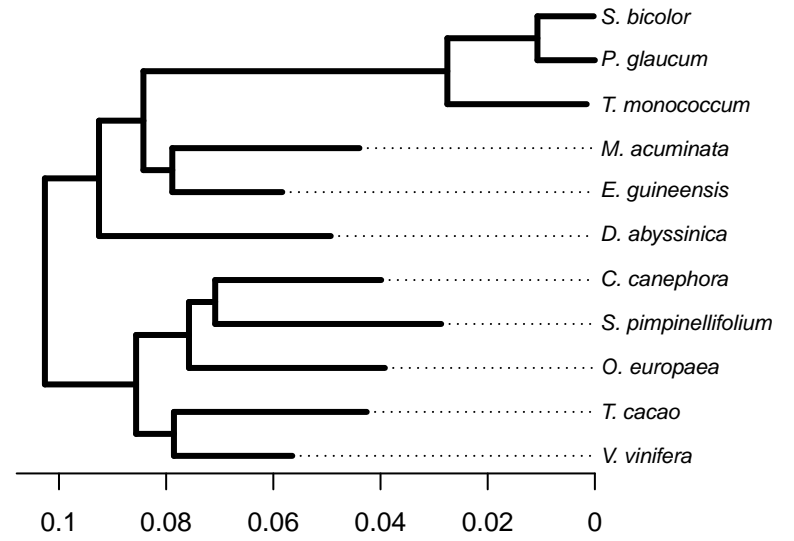

branch lengths = dS

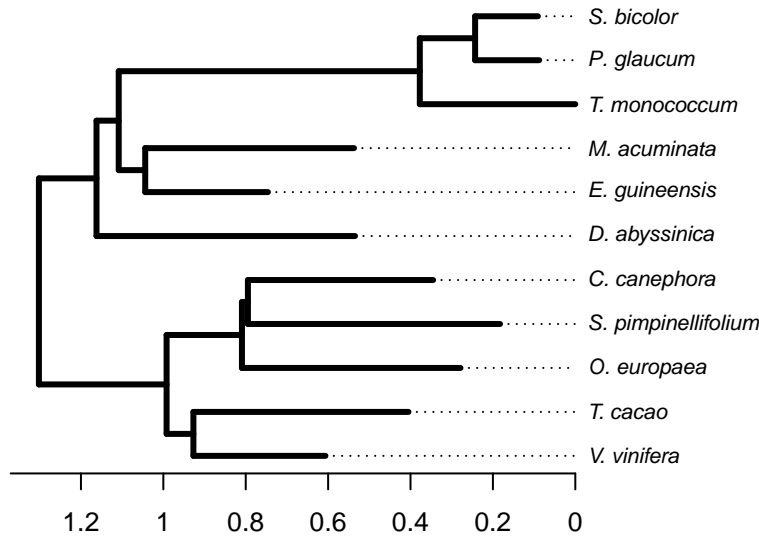

Supplement: pgen.1006799.s015.pdf [file pgen.1006799.s015.pdf]
