# Supplementary material for: Evolutionary forces affecting synonymous variations in plant genomes
Source: PLoS Genet. 2017 May 22;13(5):e1006799. doi: 10.1371/journal.pgen.1006799 (PMC5460877; doi:10.1371/journal.pgen.1006799)
Supplement: S1 Table — (XLSX) [file pgen.1006799.s005.xlsx]

## Sheet: Coffea_canephora
Samples
ARCAD ID	Species	Acession name	Provider	Locality
CS1	Coffea canephora	C47	CIRAD, BRC Perennial Plants, French Guiana	Ivory Coast
CS2	Coffea canephora	C41	CIRAD, BRC Perennial Plants, French Guiana	Ivory Coast
CS3	Coffea canephora	S9/23	CIRAD, Montpellier France	Democratic Republic of Congo
CS5	Coffea canephora	C55	CIRAD, BRC Perennial Plants, French Guiana	Ivory Coast
CS6	Coffea canephora	D/1/25	CIRAD, Montpellier France	Ivory Coast
CS7	Coffea canephora	C40	CIRAD, BRC Perennial Plants, French Guiana	Ivory Coast
CS8	Coffea canephora	Cd1	CIRAD, BRC Perennial Plants, French Guiana	Ivory Coast
CS9	Coffea canephora	Cd235	CIRAD, BRC Perennial Plants, French Guiana	Ivory Coast
CS10	Coffea canephora	C27	CIRAD, BRC Perennial Plants, French Guiana	Ivory Coast
CS11	Coffea canephora	Cd3	CIRAD, BRC Perennial Plants, French Guiana	Ivory Coast
CS12	Coffea canephora	C46	CIRAD, BRC Perennial Plants, French Guiana	Ivory Coast
CS13	Coffea canephora	S19/73	CIRAD, Montpellier France	Democratic Republic of Congo
CB1	Tricalysia congesta subsp. congesta	20041442-78	Botanic Garden Meise, Belgium	Zambia
CB4	Coffea pseudozanguebariae	PSE BM 12/8	IRD, BRC Coffea, La Réunion	Kenya
Source of RNA
inflorescence	0.8
leave	0.2

## Sheet: Dioscorea_abyssinica
Samples
ARCAD ID	Species	Acession name	Provider	Locality
IgS1	Dioscorea abyssinica	A4854	IRD	Benin
IgS2	Dioscorea abyssinica	A4856	IRD	Benin
IgS3	Dioscorea abyssinica	A4857	IRD	Benin
IgS4	Dioscorea abyssinica	A4858	IRD	Benin
IgS5	Dioscorea abyssinica	A4859	IRD	Benin
IgS6	Dioscorea praehensilis	P4896	IRD	Benin
IgB1	Dioscorea trifida		CRB Plantes Tropicales Guadeloupe	Benin
Source of RNA
inflorescence	0.8
leave	0.2

## Sheet: Elaeis_guineensis
Samples
ARCAD ID	Species	Acession name	Provider	Locality
PC1	Elaeis guineensis	C47 / 153.10.10.01	INRAB-Pobè, Bénin	Ivory Coast
PC2	Elaeis guineensis	C41 / 153.10.10.03	INRAB-Pobè, Bénin	Ivory Coast
PC3	Elaeis guineensis	S9/23 / 226.12.12.23	INRAB-Pobè, Bénin	Ivory Coast
PC4	Elaeis guineensis	C55 / 226.11.11.23	INRAB-Pobè, Bénin	Ivory Coast
PC5	Elaeis guineensis	D/1/25 / 302.01.01.22	INRAB-Pobè, Bénin	Democratic Republic of the Congo
PC6	Elaeis guineensis	C40 / 302.01.01.23	INRAB-Pobè, Bénin	Democratic Republic of the Congo
PC7	Elaeis guineensis	Cd1 / 156.08.08.01	INRAB-Pobè, Bénin	NA
PC8	Elaeis guineensis	Cd235 / 156.09.08.01	INRAB-Pobè, Bénin	NA
PC9	Elaeis guineensis	C27 / 159.09.09.02	INRAB-Pobè, Bénin	NA
PC10	Elaeis guineensis	Cd3 / 159.10.10.01	INRAB-Pobè, Bénin	NA
PB1	Phoenix dactylifera	TF7/TM14	CRRAO	Tunisia
PB3	Mauritia flexuosa	PSE BM 12/8 / MF0001	Nr Kourou, French Guiana	French Guiana
Source of RNA
inflorescence	0.8
leave	0.2

## Sheet: Musa_acuminata
Samples
ARCAD ID	Species	Acession name	Provider	Locality
BS1	Musa acuminata subsp. microcarpa	Bornéo	CRB Plantes Tropicales Guadeloupe	NA
BS2	Musa acuminata subsp. zebrina	Monyet	CRB Plantes Tropicales Guadeloupe	Indonesia
BS3	Musa acuminata	Agutay	CRB Plantes Tropicales Guadeloupe	NA
BS4	Musa acuminata subsp. zebrina	Maia oa	CRB Plantes Tropicales Guadeloupe	Martinique
BS5	Musa acuminata subsp. microcarpa	Microcarpa	CRB Plantes Tropicales Guadeloupe	NA
BS6	Musa acuminata subsp. malaccensis	Pahang (PT-BA-00267)	CRB Plantes Tropicales Guadeloupe	Malaysia
BS7	Musa acuminata subsp. malaccensis	Selangor	CRB Plantes Tropicales Guadeloupe	NA
BS8	Musa acuminata subsp. burmannicoides	Calcutta 4	CRB Plantes Tropicales Guadeloupe	NA
BS9	Musa acuminata subsp. banksii	Banksii ITC0853	Collection Musacées CARBAP Cameroun	Papua New Guinea
BS10	Musa acuminata subsp. banksii	Banksii ITC0620	Collection Musacées CARBAP Cameroun	Papua New Guinea
BB1	Musa balbisiana	Pisang Klutuk Wulung	CRB Plantes Tropicales Guadeloupe	Indonesia
BB2	Musa becarii	Musa becarii	CRB Plantes Tropicales Guadeloupe	NA
Source of RNA
inflorescence	0.65
leave	0.15
fruit	0.1

## Sheet: Olea_europea
Samples
ARCAD ID	Species	Acession name	Provider	Locality
DA1	Olea europea ssp. europea var sylvestris		CBNMed Porquerolles	Morocco
DA3	Olea europea ssp. europea var sylvestris		CBNMed Porquerolles	Morocco
MZ1	Olea europea ssp. europea var sylvestris		CBNMed Porquerolles	Morocco
MZ4	Olea europea ssp. europea var sylvestris		CBNMed Porquerolles	Morocco
OS1	Olea europea ssp. europea var sylvestris	Al Asharinah S2-9 / R2-A5	CBNMed Porquerolles	Syria
OS10	Olea europea ssp. europea var sylvestris	Izmir 6 / R2-A40	CBNMed Porquerolles	Turkey
OS3	Olea europea ssp. europea var sylvestris	Tamri -Immouzer / R2-A4	CBNMed Porquerolles	Morocco
OS4	Olea europea ssp. europea var sylvestris	Harem 5 / R3-A28	CBNMed Porquerolles	Syria
OS5	Olea europea ssp. europea var sylvestris	Izmir 5 / R3-A43	CBNMed Porquerolles	Turkey
OS9	Olea europea ssp. europea var sylvestris	Harem 1 / R3-A30	CBNMed Porquerolles	Syria
OB4	Olea europea ssp. cuspidata	Grahamstown no 3	CEFE Montpellier	South Africa
OB1	Phillyrea angustifolia	G1_ 101B2	CEFE Montpellier	France
OB2	Phillyrea angustifolia	G2_043A11	CEFE Montpellier	France
OB3	Phillyrea angustifolia	M3_040B10	CEFE Montpellier	France
Source of RNA
inflorescence	0.65
leave	0.15
fruit	0.1

## Sheet: Pennisetum_glaucum
Samples
ARCAD ID	Species	Acession name	Provider	Locality
MS1	Pennisetum glaucum ssp. molissimum	Pe01458	IRD	Senegal
MS2	Pennisetum glaucum ssp. molissimum	Pe05720	IRD	Mali
MS3	Pennisetum glaucum ssp. molissimum	Pe08055	IRD	Mauritania
MS4	Pennisetum glaucum ssp. molissimum	Pe08038	IRD	Mauritania
MS5	Pennisetum glaucum ssp. molissimum	Pe08165	IRD	Mal
MS6	Pennisetum glaucum ssp. molissimum	Pe08482	IRD	Niger
MS7	Pennisetum glaucum ssp. molissimum	Pe08721	IRD	Chad
MS8	Pennisetum glaucum ssp. molissimum	Pe08127	IRD	Niger
MS9	Pennisetum glaucum ssp. molissimum	Pe08744	IRD	Sudan
MS10	Pennisetum glaucum ssp. molissimum	PE11359	IRD	Mali
MB1	Pennisetum polystachion	X874	IRD	NA
MB2	Pennisetum alopecuroides	O871	IRD	NA
Source of RNA
inflorescence	0.65
leave	0.15
seed	0.1

## Sheet: Solanum_pimpimellifolium
Samples
ARCAD ID	Species	Acession name	Provider	Locality
SS1	Solanum pimpinellifolium	LA1589	Genetic Resources Center for Vegetable Species (CRB-Leg)	Peru
SS2	Solanum pimpinellifolium	LA1478	Genetic Resources Center for Vegetable Species (CRB-Leg)	Peru
SS3	Solanum pimpinellifolium	LA1582	Genetic Resources Center for Vegetable Species (CRB-Leg)	Peru
SS4	Solanum pimpinellifolium	LA1593	Genetic Resources Center for Vegetable Species (CRB-Leg)	Peru
SS5	Solanum pimpinellifolium	LA1602	Genetic Resources Center for Vegetable Species (CRB-Leg)	Peru
SS6	Solanum pimpinellifolium	LA1729	Genetic Resources Center for Vegetable Species (CRB-Leg)	Peru
SS7	Solanum pimpinellifolium	L.pimpi.site10(F300044)	Genetic Resources Center for Vegetable Species (CRB-Leg)	Peru
SS8	Solanum pimpinellifolium	732292	Genetic Resources Center for Vegetable Species (CRB-Leg)	Peru
SS9	Solanum pimpinellifolium	LA0411	Genetic Resources Center for Vegetable Species (CRB-Leg)	Ecuador
SS10	Solanum pimpinellifolium	LA1245	Genetic Resources Center for Vegetable Species (CRB-Leg)	Ecuador
SB1	Capsicum annuum	Yolo	Genetic Resources Center for Vegetable Species (CRB-Leg)	France
SB3	Solanum melongena	MM738	Genetic Resources Center for Vegetable Species (CRB-Leg)	France
Source of RNA
inflorescence	0.65
leave	0.15
fruit	0.1

## Sheet: Sorghum_bicolor
Samples
ARCAD ID	Species	Acession name	Provider	Locality
ES1	Sorghum_bicolor	IS14564	Sudan	International Crops Research Institute for the Semi-Arid Tropics
ES2	Sorghum_bicolor	IS18821	Egypt	International Crops Research Institute for the Semi-Arid Tropics
ES3	Sorghum_bicolor	IS18909	Chad	International Crops Research Institute for the Semi-Arid Tropics
ES4	Sorghum_bicolor	IS18824	Côte d'ivoire	International Crops Research Institute for the Semi-Arid Tropics
ES5	Sorghum_bicolor	IS18833	Malawi	International Crops Research Institute for the Semi-Arid Tropics
ES7	Sorghum_bicolor	IS14312	South Africa	International Crops Research Institute for the Semi-Arid Tropics
ES9	Sorghum_bicolor	IS14719	Ethiopia	International Crops Research Institute for the Semi-Arid Tropics
ES10	Sorghum_bicolor	IS18804	USA	International Crops Research Institute for the Semi-Arid Tropics
ES11	Sorghum_bicolor	IS18812	Egypt	International Crops Research Institute for the Semi-Arid Tropics
EB1	Sorghum brachypodum	Brachypodum	NA	Australian Tropical Crops and Forages Collection (QDPI)
Source of RNA
inflorescence	0.65
leave	0.15
seed	0.1

## Sheet: Theobroma_cacao
Samples
ARCAD ID	Species	Acession name	Provider	Locality
KS1	Theobroma cacao	GU230B	CIRAD-French Guiana	French Guiana
KS2	Theobroma cacao	GU139A	CIRAD-French Guiana	French Guiana
KS3	Theobroma cacao	LCTEEN195	CRC(Cocoa Research Center - Trinidad	Ecuador
KS4	Theobroma cacao	LCTEEN218	CRC(Cocoa Research Center - Trinidad	Ecuador
KS5	Theobroma cacao	LCTEEN332	CRC(Cocoa Research Center - Trinidad	Ecuador
KS6	Theobroma cacao	LCTEEN83/S8	CRC(Cocoa Research Center - Trinidad	Ecuador
KS7	Theobroma cacao	SPA10	CRC(Cocoa Research Center - Trinidad	Colombia
KS8	Theobroma cacao	MO76	CRC(Cocoa Research Center - Trinidad	Peru
KS9	Theobroma cacao	PA120	CRC(Cocoa Research Center - Trinidad	Peru
KS10	Theobroma cacao	NA230	CRC(Cocoa Research Center - Trinidad	Peru
KB1	Herrania nitida	Herrania	CRC(Cocoa Research Center - Trinidad	Colombia
KB2	Theobroma speciosa	T. speciosa	CRC(Cocoa Research Center - Trinidad	Brazil
Source of RNA
inflorescence	0.8
leave	0.2

## Sheet: Triticum_monococcum
Samples
ARCAD ID	Species	Acession name	Provider	Locality
TS1	Triticum monococcum ssp. boeoticum	EP 010	USDA	Turkey
TS2	Triticum monococcum ssp. boeoticum	EP 075	USDA	Turkey
TS3	Triticum monococcum ssp. boeoticum	EP 100	USDA	Irak
TS4	Triticum monococcum ssp. boeoticum	BOE2004-7-3-9-8 326	Hakan Ozkan	Turkey
TS5	Triticum monococcum ssp. boeoticum	BOE2005-7-5-9-3 5010	Hakan Ozkan	Turkey
TS6	Triticum monococcum ssp. boeoticum	EP 080	USDA	Turkey
TS7	Triticum monococcum ssp. boeoticum	EP 091	USDA	Turkey
TS8	Triticum monococcum ssp. boeoticum	EP 025	USDA	Turkey
TS9	Triticum monococcum ssp. boeoticum	EP 063	USDA	Turkey
TS10	Triticum monococcum ssp. boeoticum	EP 004	USDA	Turkey
TB1	Eremopyrum bonaepartis	PI203442	USDA	Turkey
TB2	Taeniatherum caput-medusae	PI577708	USDA	Turkey
Source of RNA
inflorescence	0.65
leave	0.15
seed	0.1

[truncated: 1 more sheets: Vitis_vinifera]
