# Supplementary material for: Evolutionary forces affecting synonymous variations in plant genomes
Source: PLoS Genet. 2017 May 22;13(5):e1006799. doi: 10.1371/journal.pgen.1006799 (PMC5460877; doi:10.1371/journal.pgen.1006799)
Supplement: S4 Table — (XLSX) [file pgen.1006799.s008.xlsx]

## Sheet: gBGC
		Model1: B0 = B1						Model2a: B0 = 0 and B1 free						Model2b: B0 free and B1 = 0						Model3: both B0 and B1 free						ln-likelihood of models without error					ln-likelihood of models with error
Group	Species	B0_1	B1_1	lambda_1	eN_1	eWS_1	eSW_1	B0_2a	B1_2a	lambda_2a	eN_2a	eWS_2a	eSW_2a	B0_2b	B1_2b	lambda_2b	eN_2b	eWS_2b	eSW_2b	B0_3	B1_3	lambda_3	eN_3	eWS_3	eSW_3	lnL0	lnL1	lnL2a	lnL2b	lnL3	lnL0e	lnL1e	lnL2ae	lnL2be	lnL3e	lnLsat
Dicot	Coffea_canephora	0.154946	0.154946	1.0408	8.26e-06	0.00613124	0.0451914	0	0.0941793	1.0318	0.0435571	0.0330893	0.109567	0.126192	0	1.03872	0.0194862	0.0163373	0.0781278	0.154104	0.242775	1.04549	3.9e-05	0.00781343	0.0413926	-349.775	-315.462	-327.671	-340.415	-303.281	-313.954	-292.854	-312.881	-298.237	-291.917	-271.176
Dicot	Olea_europea	0.12914	0.12914	1.59495	0.0318259	0.0534276	0.0580394	0	0.0323519	1.5568	0.0318935	0.052239	0.0594031	0.167131	0	1.57368	0.0126261	0.0324906	0.0425864	0.167128	0.0308828	1.58187	0.00158028	0.022042	0.0320195	-269.516	-259.584	-265.365	-264.425	-259.566	-250.555	-245.352	-250.466	-244.298	-244.217	-228.317
Dicot	Solanum_pimpinellifolium	0.0724329	0.0724329	2.23054	0.00580828	5.19e-06	0.137248	0	0.290553	1.97963	0.141117	0.151376	0.229088	0.0408341	0	2.13489	0.0658048	0.0629657	0.18104	0.114263	0.758621	2.05245	0.000196291	0.0624961	0.0821549	-171.922	-171.922	-160.553	-169.434	-159.5	-159.76	-159.523	-159.446	-159.698	-158.677	-143.383
Dicot	Theobroma_cacao	0.296895	0.296895	1.64315	2.53e-06	0.00546033	0.041265	0	-0.281847	1.3622	0.0556286	0.0500886	0.10762	0.235976	0	1.57534	0.0252608	0.0223215	0.0740904	0.316428	0.464892	1.66523	6.48e-06	0.0111412	0.0350968	-302.763	-244.985	-298.389	-274.06	-232.078	-280.572	-228.036	-275.799	-234.888	-226.918	-214.941
Dicot	Vitis_vinifera	0.366405	0.366405	2.15809	3.15e-06	0.0197097	0.00641257	0	-0.410991	1.72104	0.0875275	0.104843	0.0851656	0.355767	0	2.0864	0.0404955	0.0485886	0.0474888	0.360489	0.0240918	2.14902	0.0105893	0.00475079	0.0275619	-452.237	-321.377	-451.231	-331.063	-312.463	-446.866	-319.638	-423.613	-303.713	-303.645	-279.503
Monocot	Dioscorea_abyssinica	0.193007	0.193007	2.13981	0.106559	0.212052	0.104038	0	0.203759	2.07975	0.133372	0.246594	0.119501	1.2049	0	2.19791	0.072042	0.153949	0.0893605	1.17118	0.00799066	2.19925	0.0720279	0.154422	0.0891531	-167.922	-143.45	-143.038	-165.144	-143.038	-134.498	-130.602	-131.276	-128.991	-128.989	-122.818
Monocot	Elaeis_guineensis	0.326386	0.326386	1.83493	6.12e-06	0.00425877	0.0116448	0	0.169752	1.59714	0.0549061	0.063589	0.059436	0.24546	0	1.73276	0.0277157	0.0250162	0.0444033	0.328141	0.516332	1.83662	0.0546273	0.0708857	0.0539494	-262.491	-222.694	-255.782	-244.342	-219.964	-257.063	-221.643	-255.305	-233.046	-219.405	-202.888
Monocot	Musa_acuminata	0.321176	0.321176	1.75875	1.22e-05	0.00284336	0.0410727	0	0.279228	1.60551	0.0632488	0.0821929	0.0866408	0.29938	0	1.67851	0.0241187	0.0247025	0.0626506	0.312673	0.39651	1.71072	0.054257	0.0738131	0.0784692	-574.895	-379.434	-371.163	-544.099	-305.089	-336.173	-267.234	-330.631	-277.803	-266.785	-235.487
Monocot	Pennisetum_glaucum	0.201186	0.201186	1.78086	0.00160579	1.17e-06	0.0697743	0	-0.0134022	1.48782	0.0751495	0.090311	0.122722	0.155365	0	1.68419	0.0413624	0.0458522	0.100576	0.224242	0.523811	1.73362	0.0715417	0.098075	0.110254	-588.118	-498.059	-421.151	-583.866	-292.816	-344.639	-270.46	-344.613	-286.796	-259.247	-240.49
Monocot	Sorghum_bicolor	0.399135	0.399135	1.63898	0.24264	0.398111	0.198466	0	-1.16228	1.28377	0.248041	0.363275	0.219098	0.435358	0	2.20238	0.0946039	0.152551	0.139227	0.37806	0.0780694	1.60601	0.242888	0.394173	0.2014	-251.451	-207.427	-242.311	-238.543	-200.436	-233.673	-195.413	-223.509	-194.596	-194.549	-173.609
Monocot	Triticum_monococcum	0.543358	0.543358	2.1281	0.15647	0.204009	0.153145	0	-1.69554	1.36515	0.165395	0.164165	0.193071	0.459251	0	2.10692	0.104975	0.113853	0.129871	0.4481	-0.00775634	1.98565	0.149978	0.181722	0.156899	-137.865	-107.889	-135.055	-116.037	-107.279	-137.463	-106.175	-114.644	-105.205	-105.205	-94.3577

## Sheet: SCU
		Model1: S0 = S1						Model2a: S0 = 0 and S1 free						Model2b: S0 free and S1 = 0						Model3: both S0 and S1 free						ln-likelihood of models without error					ln-likelihood of models with error
Group	Species	B0_1	B1_1	lambda_1	eN_1	eWS_1	eSW_1	B0_2a	B1_2a	lambda_2a	eN_2a	eWS_2a	eSW_2a	B0_2b	B1_2b	lambda_2b	eN_2b	eWS_2b	eSW_2b	B0_3	B1_3	lambda_3	eN_3	eWS_3	eSW_3	lnL0	lnL1	lnL2a	lnL2b	lnL3	lnL0e	lnL1e	lnL2ae	lnL2be	lnL3e	lnLsat
Dicot	Coffea_canephora	0.147979	0.147979	0.887452	0.00279951	1.11e-05	0.032687	0	0.0530906	0.879738	0.0544684	0.0343833	0.107031	0.12472	0	0.890433	0.028915	0.0155212	0.0738798	0.147573	0.195683	0.888081	0.00119939	4.98e-05	0.0280727	-335.113	-309.627	-317.893	-328.472	-299.977	-308.418	-293.672	-308.156	-296.607	-293.46	-276.233
Dicot	Olea_europea	0.115719	0.115719	1.19207	0.0454936	0.0547035	0.0560151	0	0.0230925	1.16503	0.0455579	0.0535584	0.0572605	0.148473	0	1.17879	0.0239242	0.0307009	0.0377268	0.148277	0.0247995	1.17967	0.0435394	0.0515599	0.055326	-256.615	-250.671	-254.558	-253.134	-250.611	-250.013	-246.566	-249.976	-245.835	-245.793	-233
Dicot	Solanum_pimpinellifolium	0.45254	0.45254	1.55488	0.210328	0.192396	0.164653	0	-1.28264	1.10649	0.218233	0.156487	0.210925	0.403197	0	1.59836	0.13711	0.0719709	0.111372	0.464744	0.566157	1.56446	0.210932	0.196109	0.163252	-179.608	-163.925	-178.157	-167.034	-163.924	-178.16	-163.368	-174.137	-163.918	-163.347	-148.254
Dicot	Theobroma_cacao	0.226241	0.226241	1.06655	0.0183369	5.96e-06	0.0339394	0	-0.179909	0.926423	0.0728568	0.0479859	0.0981373	0.176622	0	1.0312	0.0438248	0.019722	0.0661968	0.245475	0.397482	1.09424	0.0726333	0.0549676	0.0873826	-271.755	-246.277	-268.024	-260.74	-237.185	-259.845	-237.061	-258.323	-240.588	-236.183	-218.396
Dicot	Vitis_vinifera	0.482522	0.482522	1.31854	0.0099263	0.0387467	7.19e-07	0	-0.510383	1.01553	0.0917337	0.0978179	0.0904142	0.453021	0	1.28111	0.0455117	0.0506369	0.0467733	0.469725	0.117557	1.26114	0.090089	0.112798	0.0776977	-508.253	-329.677	-493.538	-309.676	-300.052	-506.703	-313.516	-477.451	-300.321	-298.995	-285.477
Monocot	Dioscorea_abyssinica	0.13877	0.13877	1.41785	0.150837	0.241975	0.123635	0	0.137126	1.41576	0.150834	0.241773	0.123628	1.2004	0	1.52209	0.0818854	0.138226	0.0854778	1.90865	-0.100626	1.68186	0.00614477	0.000273534	0.0489765	-154.281	-140.841	-140.74	-152.474	-140.734	-133.102	-131.501	-131.912	-129.582	-129.322	-125.563
Monocot	Elaeis_guineensis	0.322534	0.322534	1.55005	0.0575176	0.0666168	0.0569684	0	0.185325	1.38222	0.0288401	0.0341554	0.0310091	0.241005	0	1.48208	0.0345507	0.0314816	0.0454652	0.323601	0.511604	1.57822	0.0578858	0.0714135	0.053627	-261.366	-227.944	-256.894	-244.856	-226.508	-258.63	-227.698	-256.802	-238.038	-225.66	-206.33
Monocot	Musa_acuminata	0.323644	0.323644	2.08913	0.00939174	2.08e-05	0.0399958	0	0.269761	1.90195	0.0722887	0.0807205	0.0864253	0.30239	0	1.99475	0.0326264	0.0211551	0.0614718	0.315141	0.392211	2.01942	0.0717399	0.0826567	0.0843802	-561.541	-367.557	-359.578	-530.731	-293.126	-334.147	-265.919	-329.169	-275.936	-265.556	-236.942
Monocot	Pennisetum_glaucum	0.187009	0.187009	1.76626	0.114877	0.107719	0.0811401	0	-0.294361	1.55114	0.115229	0.0977912	0.0888651	0.163898	0	1.77224	0.0724306	0.0478368	0.048026	0.181024	0.12551	1.75666	0.114595	0.106214	0.0816898	-315.906	-274.965	-315.392	-284.275	-274.88	-298.279	-259.229	-290.373	-259.947	-258.984	-244.335
Monocot	Sorghum_bicolor	0.157341	0.157341	2.30188	0.0399963	2.03e-05	0.022283	0	0.441413	1.78297	0.0781889	0.124281	1.95e-07	0.143679	0	2.20552	0.13398	0.11312	0.107108	0.139387	0.438798	2.0388	0.0585477	0.0856412	5.62e-05	-198.724	-194.228	-197.529	-197.566	-193.247	-196.807	-193.037	-195.935	-193.658	-192.583	-178.135
Monocot	Triticum_monococcum	0.571351	0.571351	2.55825	0.167825	0.211458	0.151123	0	-1.73094	1.61179	0.172462	0.171686	0.195702	0.48197	0	2.56295	0.107928	0.103565	0.123895	0.533804	0.235595	2.84245	0.0328772	6e-05	0.0704655	-136.156	-105.141	-133.274	-113.511	-104.581	-136.006	-103.983	-115.481	-103.795	-103.642	-96.3067
